# Supplementary material
Source: PubMed Central journal article supplement (PMC7000403)
Supplement: 41423_2018_187_MOESM2_ESM.pdf [file 41423_2018_187_MOESM2_ESM.pdf]

A.

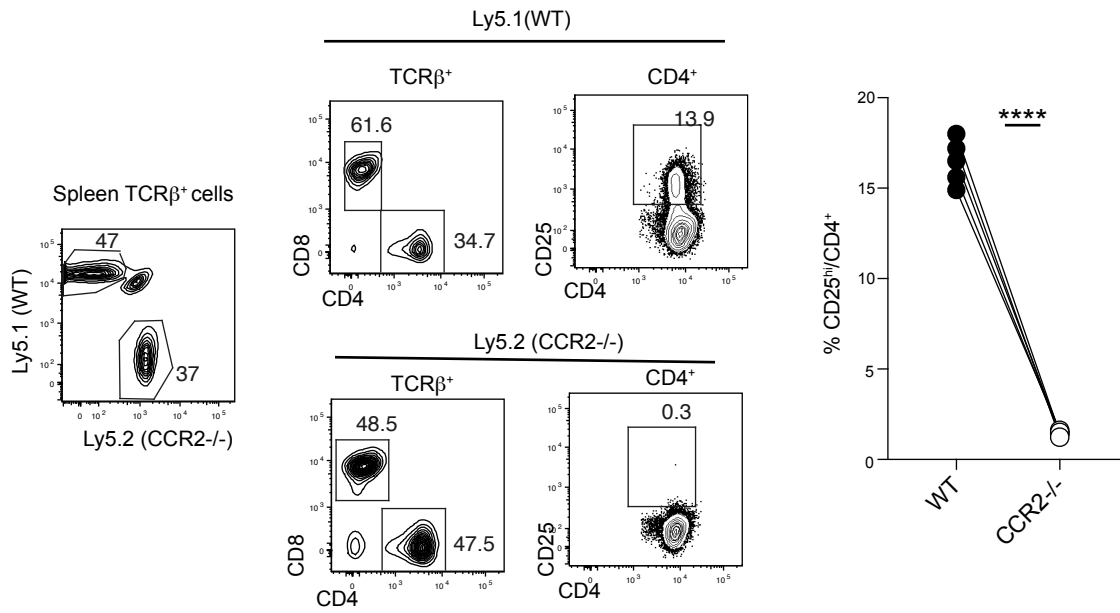

B.

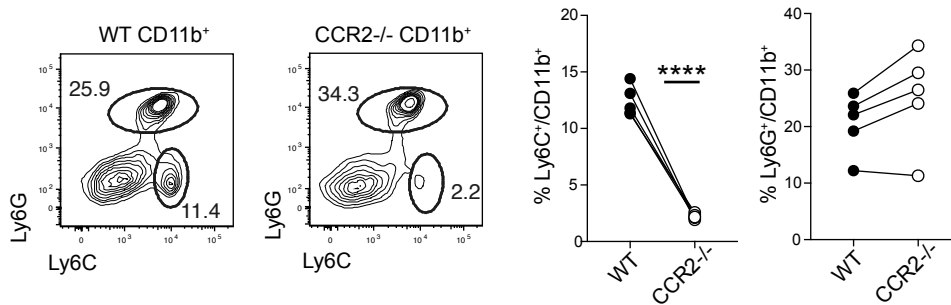

Supplemental Figure 2. A&B. CCR2 deficiency intrinsically reduces spleen CD25 $^{hi}$ Tregs and Ly6C $^+$ CD11b $^+$  monocytes. Lethally irradiated Ly5.1/C57BL/6 (Ly5.2) recipients were reconstituted with bone marrow cells from WT (Ly5.1) and CCR2 $^{-/-}$  mice (Ly5.2). Ten weeks after reconstitution, spleen cells from 5 individual mice were evaluated for T cell compartment (A) and CD11b $^+$  myeloid cells (B). \* P<0.05, \*\*P<0.01, \*\*\*P<0.001, \*\*\*\*P<0.0001 by paired t test.
